# Supplementary material for: Potential Effect of Hydroxychloroquine in Diabetes Mellitus: A Systematic Review on Preclinical and Clinical Trial Studies
Source: Hindawi journal article supplement (doi:10.1155/2020/5214751), 2020-02-28

**Table S1:** The quality assessment of included preclinical studies according to a modified CAMARADES checklist items (Macleod *et al.*, 2004; Yimer *et al.*, 2019).

| References                       | Criteria |    |     |    |   |    |     |      |    |   | Total (of 10) | Mean Quality scores |
|----------------------------------|----------|----|-----|----|---|----|-----|------|----|---|---------------|---------------------|
|                                  | I        | II | III | IV | V | VI | VII | VIII | IX | X |               |                     |
| (Zannah <i>et al.</i> , 2014)    | 1        | 1  | 1   | 1  | 1 | 0  | 1   | 1    | 1  | 1 | 9             | 8.66 ± 0.33         |
| (Abdel-Hamid and Firgany., 2016) | 1        | 1  | 1   | 1  | 1 | 0  | 1   | 1    | 1  | 1 | 9             |                     |
| (Wang and Kukreja., 2017)        | 1        | 1  | 1   | 1  | 1 | 0  | 1   | 1    | 0  | 1 | 8             |                     |

I: Publication in peer-reviewed journal, II: Number of experimental and control groups, III: Housing and Husbandry Conditions, IV: Details of intervention/ exposure group procedures, V: Random allocation to groups, VI: Concealment of allocation, VII: Blinded assessment of outcomes, VIII: Biochemical evaluations, IX: Histopathological evaluations, X: Statistical analysis 1: Criterion is satisfied, 0: Insufficiently described or not explained at all; the mean quality score is expressed as mean ± standard error of the mean (SEM) and (minimum and maximum score)

**Table S2:** Evaluation of quality of included observational and cohort studies by Newcastle-Ottawa scale (NOS) (Wells *et al.*, 2009)

| Cohort studies<br>(n = 4)          | Selection (4)                                  |                                           |                              |                                                               | Comparability<br>(2)                                       | Exposure                                   |                                                        |                                        | Total<br>(0-9) |
|------------------------------------|------------------------------------------------|-------------------------------------------|------------------------------|---------------------------------------------------------------|------------------------------------------------------------|--------------------------------------------|--------------------------------------------------------|----------------------------------------|----------------|
|                                    | Representativeness<br>of the exposed<br>cohort | Selection of the<br>non-exposed<br>cohort | Ascertainment of<br>exposure | Outcome of<br>interest not<br>present at<br>start of<br>study | control for<br>important factor<br>or<br>additional factor | Ascertainment of<br>outcome                | Follow-up<br>long enough form<br>outcome s to<br>occur | Adequacy of<br>follow-up of<br>cohorts |                |
| Chen <i>et al.</i> , 2019          | *                                              | *                                         | *                            | *                                                             | **                                                         | *                                          | -                                                      | -                                      | 7              |
| Singh <i>et al.</i> , 2018         | *                                              | *                                         | *                            | *                                                             | **                                                         | *                                          | *                                                      | *                                      | 9              |
| Chen <i>et al.</i> , 2017          | *                                              | *                                         | *                            | *                                                             | *                                                          | *                                          | *                                                      | *                                      | 8              |
| Chen <i>et al.</i> , 2015          | *                                              | --                                        | *                            | *                                                             | *                                                          | *                                          | *                                                      | *                                      | 7              |
| Observational<br>studies<br>(n =5) | Selection (4)                                  |                                           |                              |                                                               | Comparability<br>(2)                                       | Exposure                                   |                                                        |                                        | Total<br>(0-9) |
|                                    | Adequate<br>definition of<br>case              | Representativeness<br>of cases            | Selection<br>of<br>controls  | Definition<br>of<br>controls                                  | Control for<br>important factor<br>or additional<br>factor | Ascertainment of<br>exposure<br>(blinding) | Some<br>method of<br>ascertainment for<br>subjects     | Non-<br>response rate                  |                |
| Chandra <i>et al.</i> ,<br>2018    | *                                              | *                                         | *                            | *                                                             | *                                                          | -                                          | *                                                      | *                                      | 7              |
| Jagnani <i>et al.</i> ,<br>2017    | *                                              | -                                         | -                            | *                                                             | **                                                         | -                                          | *                                                      | -                                      | 5              |
| Baidya <i>et al.</i> ,<br>2018a    | *                                              | *                                         | *                            | *                                                             | *                                                          | *                                          | *                                                      | -                                      | 7              |
| Ahmed <i>et al.</i> ,<br>2018      | *                                              | *                                         | *                            | *                                                             | **                                                         | *                                          | *                                                      | *                                      | 8              |
| Kumar <i>et al.</i> , 2018         | *                                              | -                                         | *                            | *                                                             | **                                                         | -                                          | *                                                      | -                                      | 6              |

**Table S3:** Risk of bias for the randomized control trial studies with the Cochrane Collaboration's tool (Higgins *et al.*, 2011)

| References                        | Random sequence generation (selection bias) | Allocation concealment (selection bias) | Blinding of participants and researchers (performance bias) | Blinding of outcome assessment (detection bias) | Incomplete outcome data (attrition bias) | Selective reporting (reporting bias) | Other bias |
|-----------------------------------|---------------------------------------------|-----------------------------------------|-------------------------------------------------------------|-------------------------------------------------|------------------------------------------|--------------------------------------|------------|
| Sheikhbahaie <i>et al.</i> , 2016 |                                             |                                         |                                                             |                                                 |                                          |                                      |            |
| Baidya <i>et al.</i> , 2018b      |                                             |                                         |                                                             |                                                 |                                          |                                      |            |
| Ranjan <i>et al.</i> , 2018       |                                             |                                         |                                                             |                                                 |                                          |                                      |            |
| Baidya and Ahmed, 2018            |                                             |                                         |                                                             |                                                 |                                          |                                      |            |
| Pareek <i>et al.</i> , 2014       |                                             |                                         |                                                             |                                                 |                                          |                                      |            |
| Wasko <i>et al.</i> , 2015        |                                             |                                         |                                                             |                                                 |                                          |                                      |            |

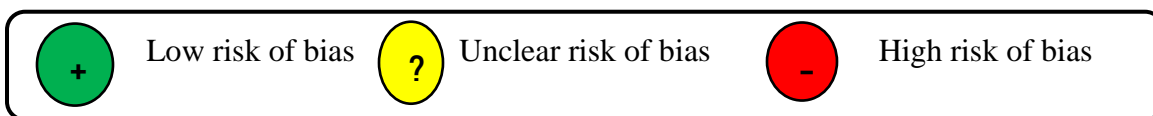

Supplement: f1 [file 5214751.f1.pdf]
